# Supplementary material for: Nuclear translocation of the tagged endogenous MAPK MPK-1 denotes a subset of activation events in C. elegans development
Source: PubMed Central journal article supplement (PMC8445601; doi:10.1242/jcs.258456), 2021-09-03
Supplement: joces-134-258456-s1.pdf [file joces-134-258456-s1.pdf]

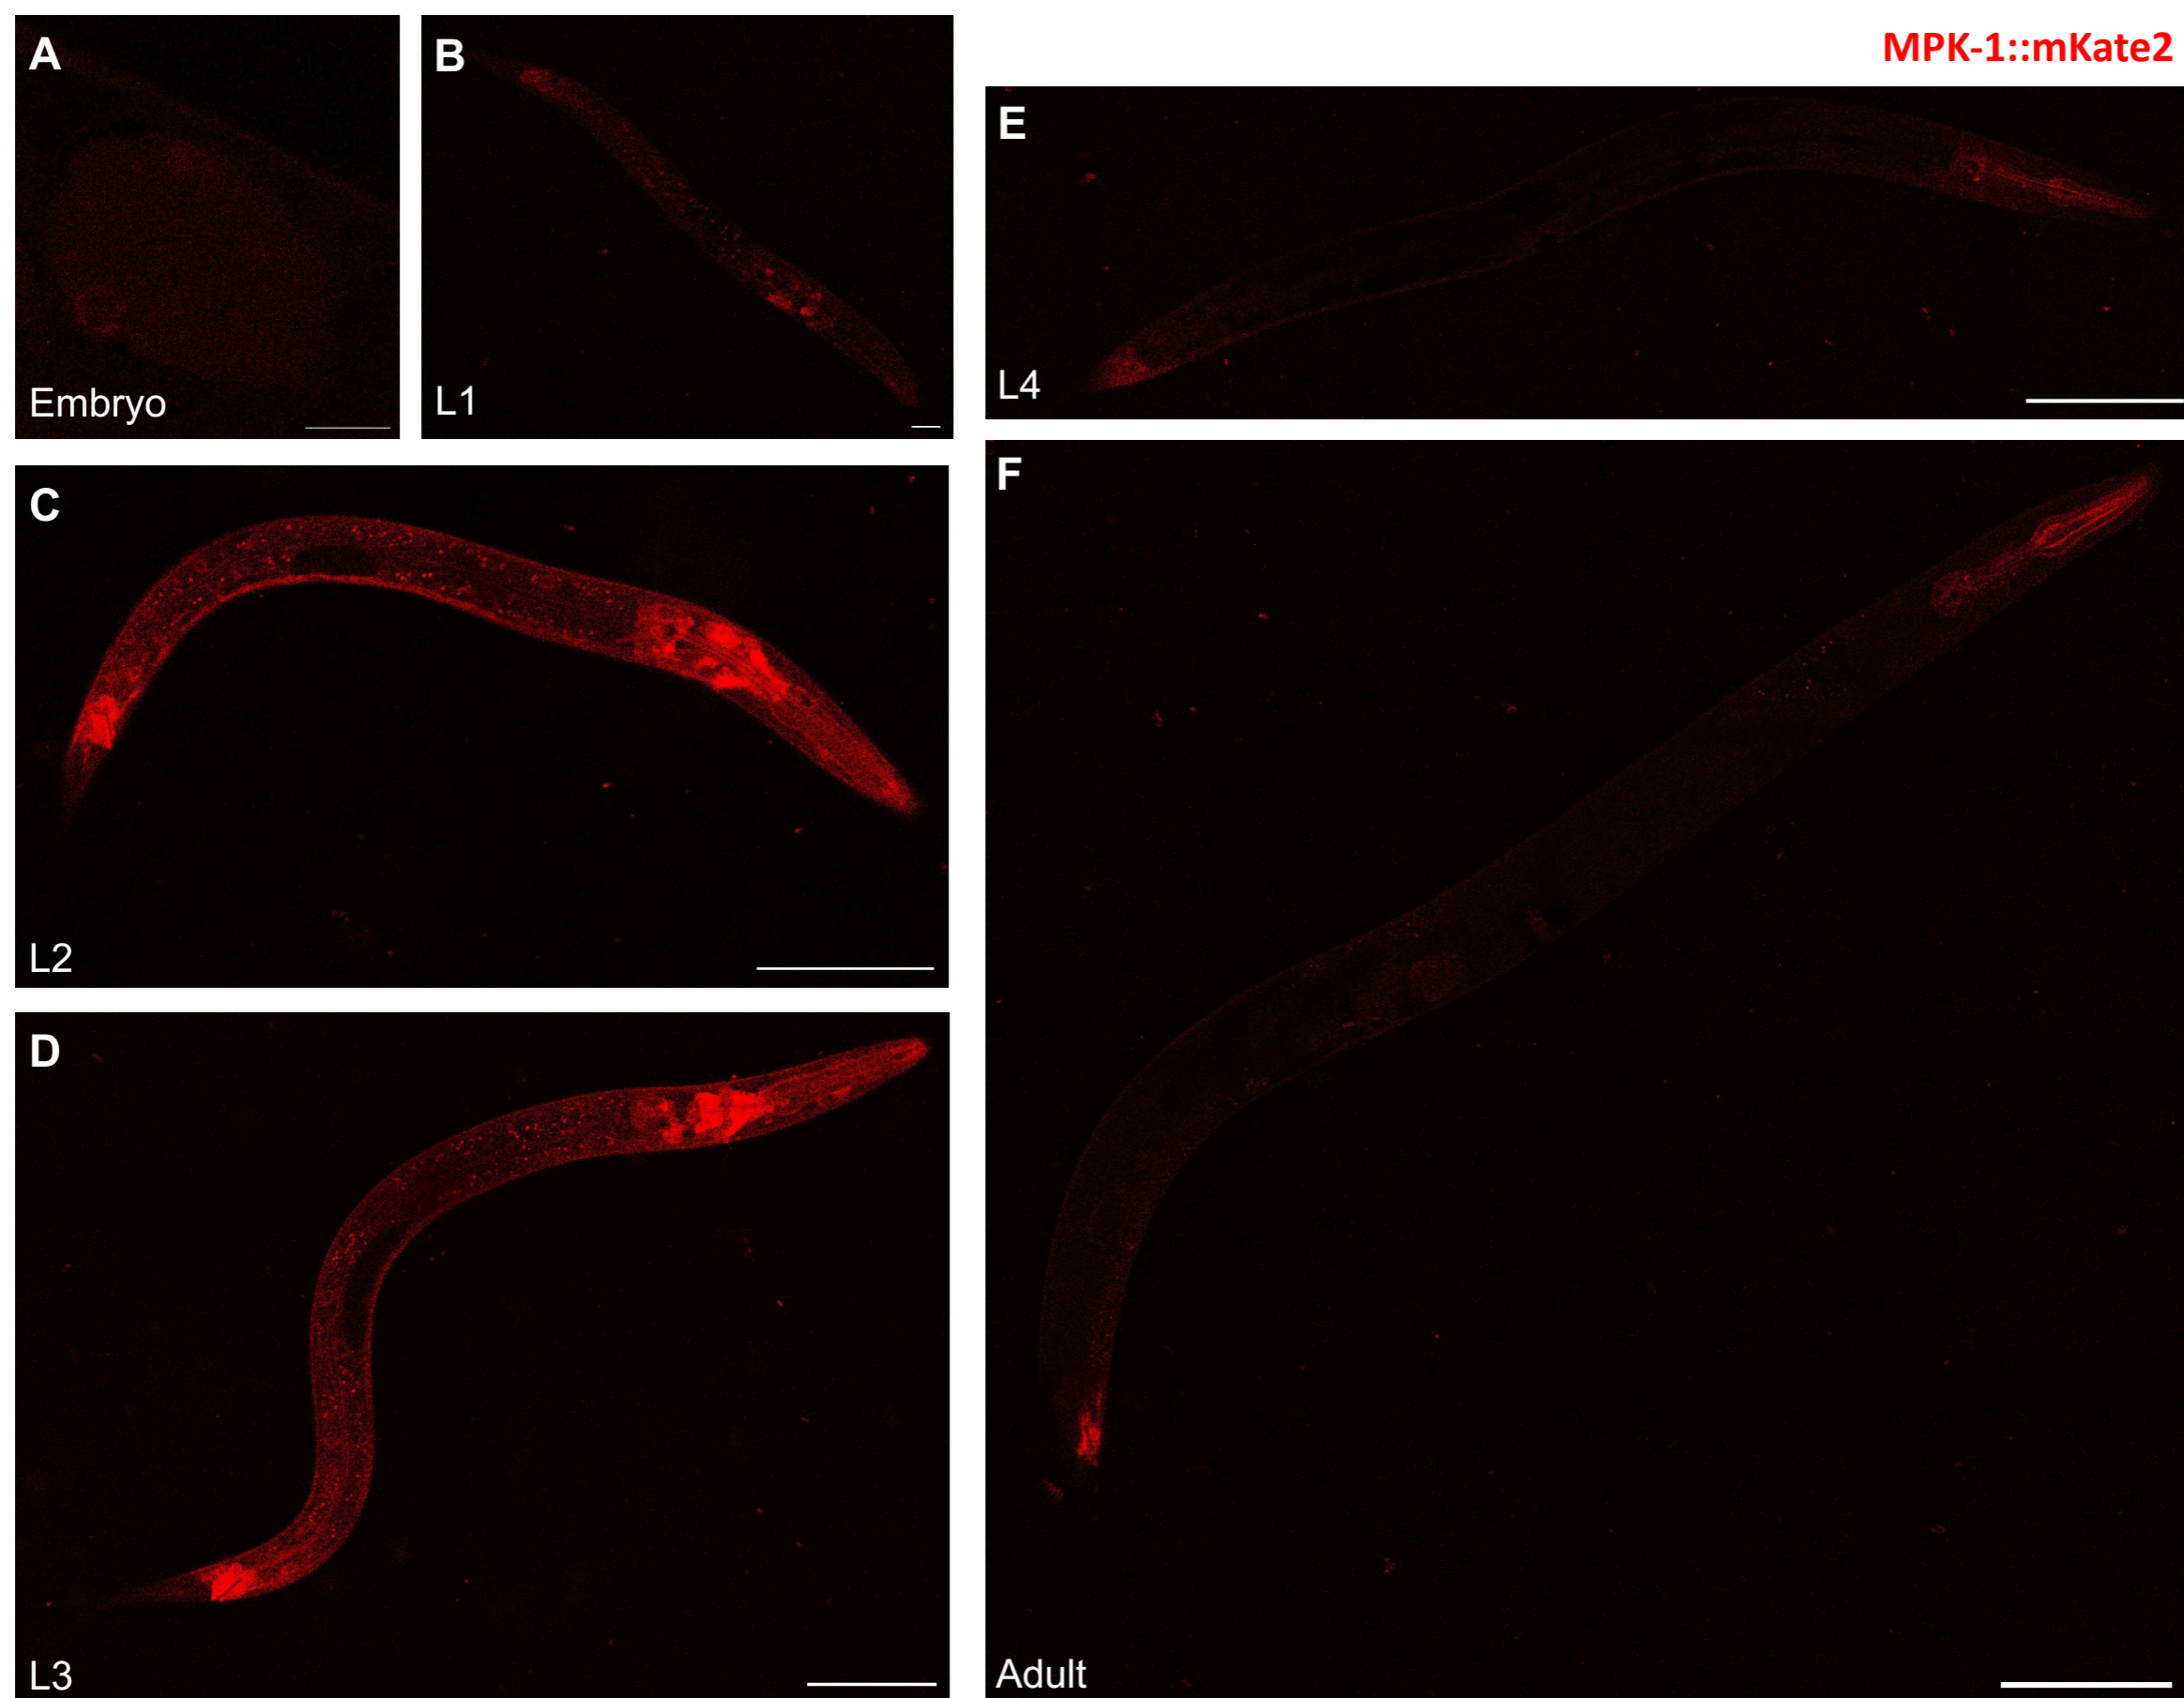

**Fig. S1. Endogenous MPK-1 is expressed throughout the animal and is elevated in certain tissues and at certain stages.** Confocal micrographs of MPK-1::mKate2 animals at different stages of the life cycle. \*\*\*\*All images were captured with the same exposure levels.\*\*\*\*\* **A)** An early stage embryo in the uterus of its mother with low background MPK-1. **B)** L1 larva. **C)** L2 larva evincing global elevation of MPK-1 expression and increased expression in the pharynx, anterior intestine and posterior intestine. **D)** L3 larva with similarly elevated expression. **E)** L4 larva with decreased global expression but relative expression still elevated in certain tissues. **F)** Adult animal with decreased expression except in rectal epithelia and the pharynx. Scale bars = 10 μm (**A,B**), 50 μm (**C,D,E**), and 100 μm (**F**).

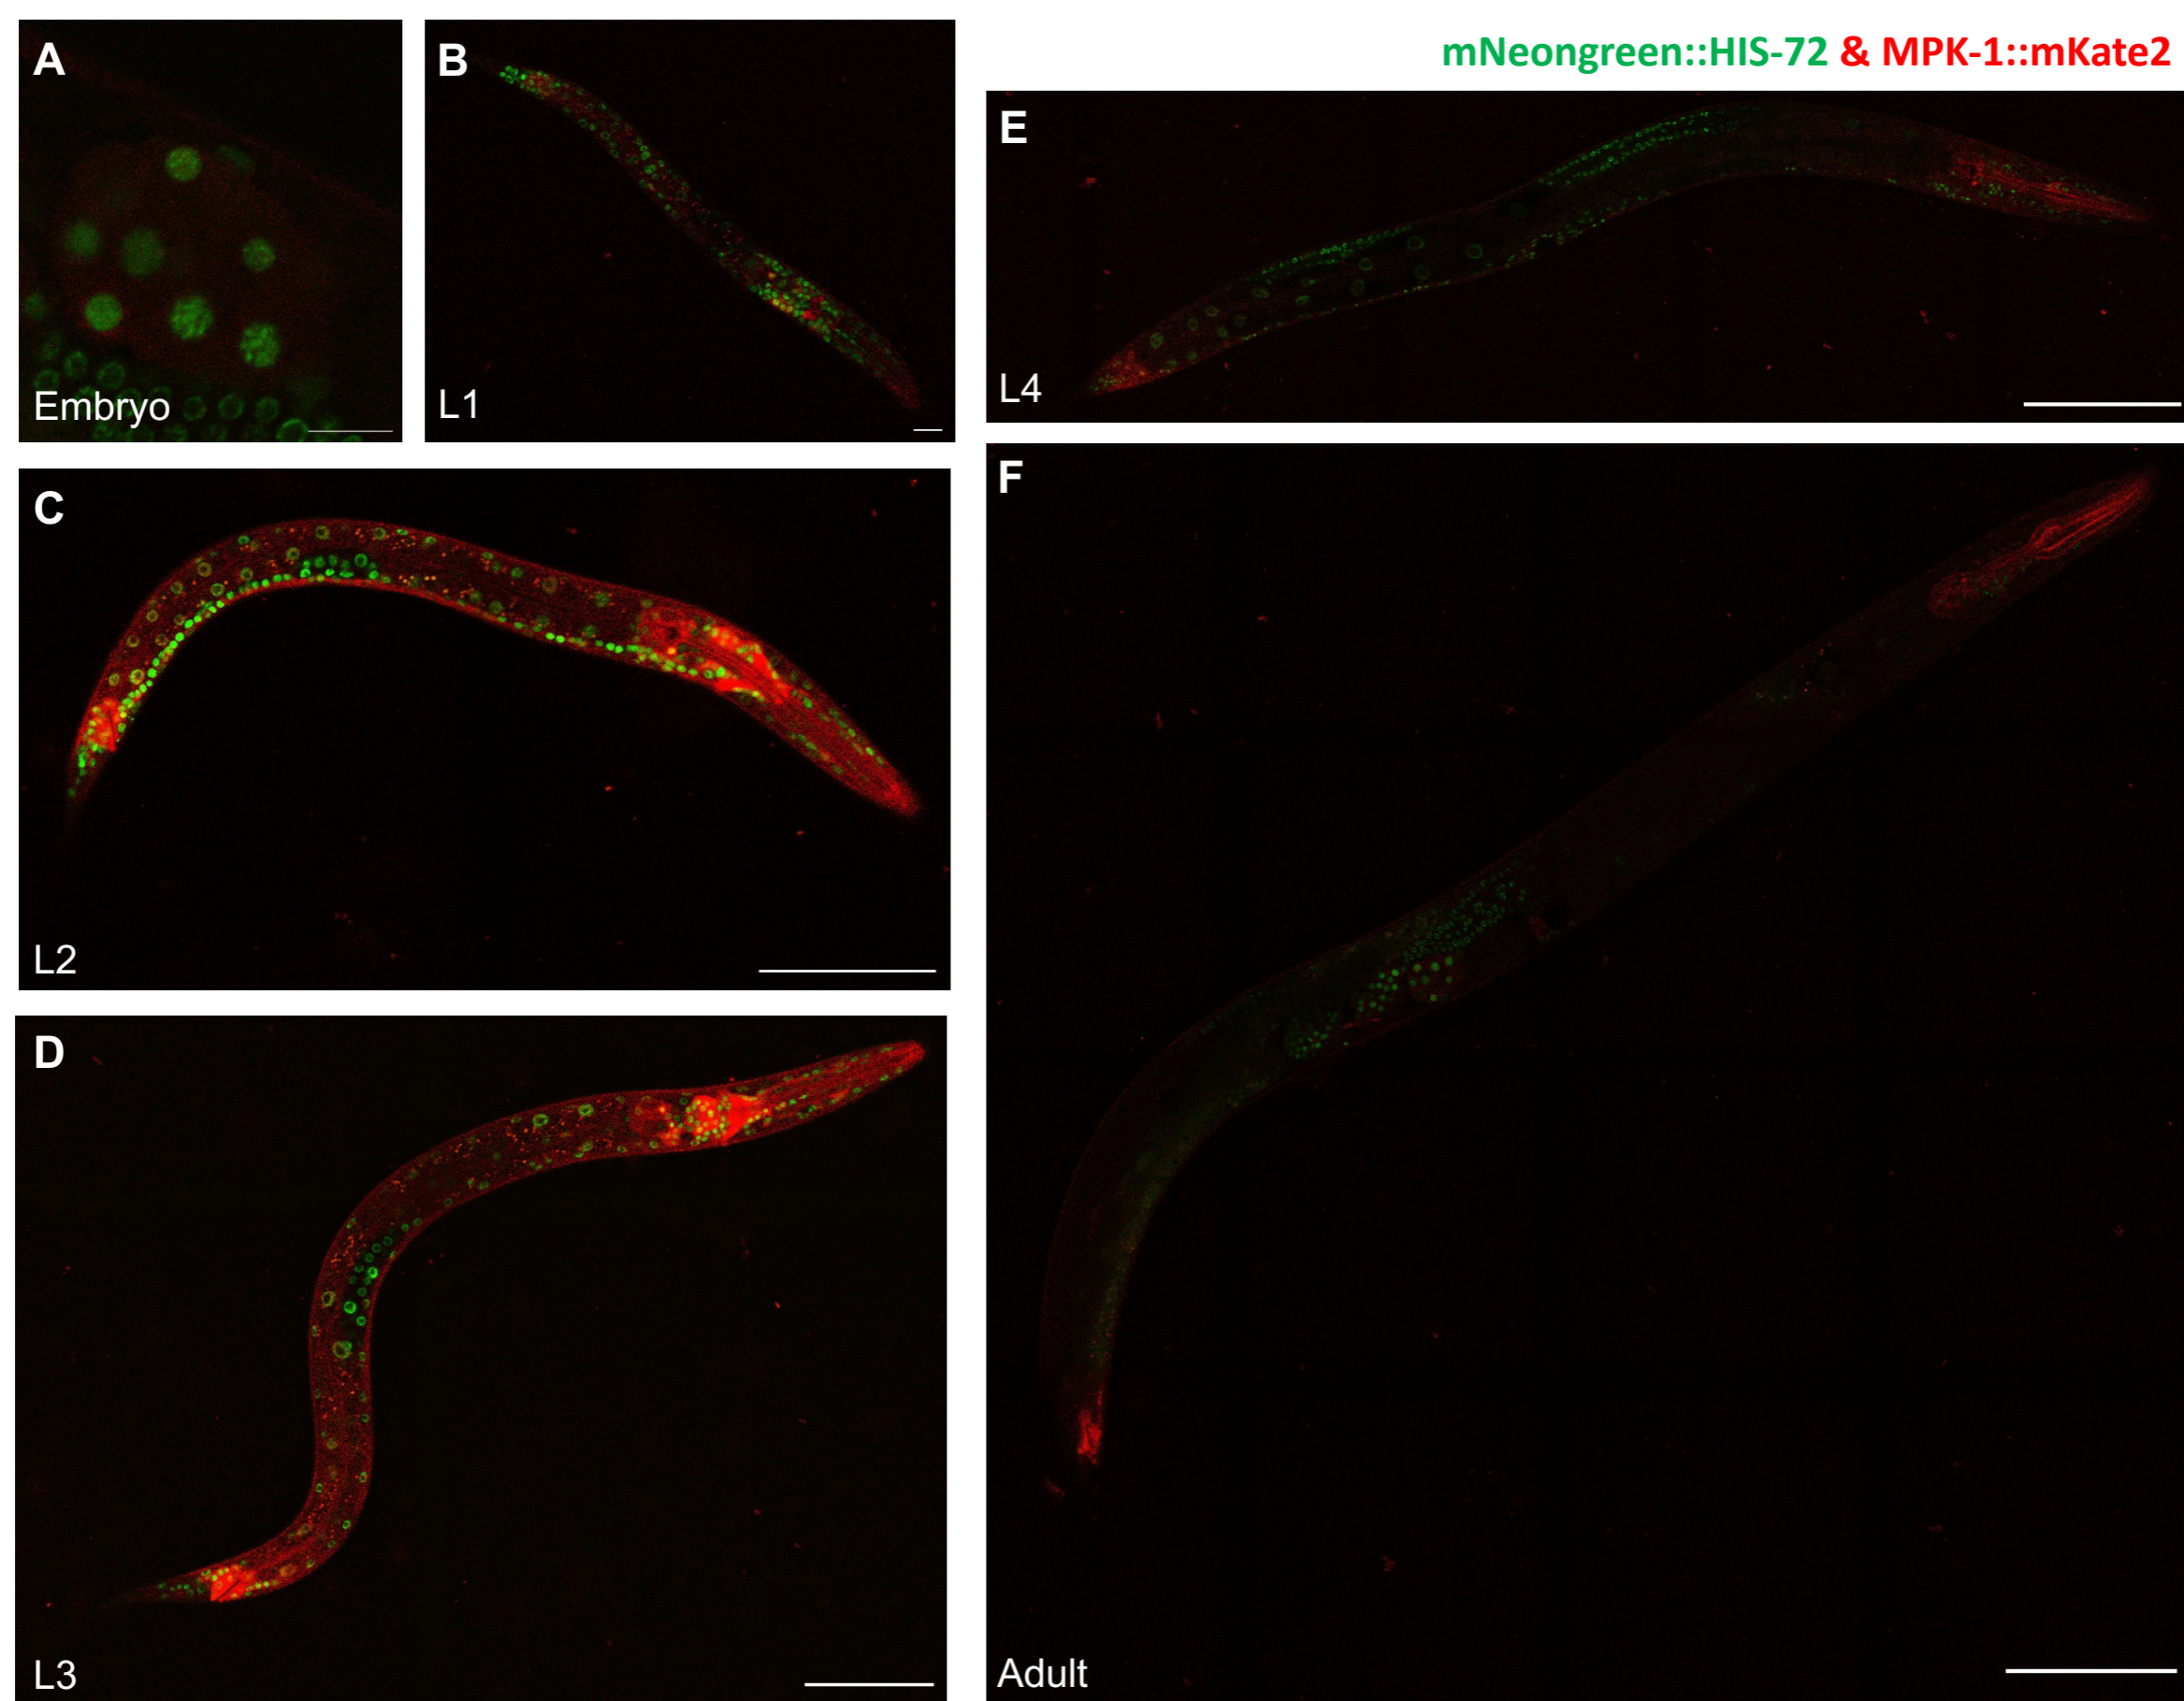

**Fig. S2. Endogenous MPK-1 with a nuclear marker as a reference point.** The same images as in Supplementary Figure 1 but with mNeonGreen::HIS-72 nuclear marker in green. **A)** An early stage embryo in the uterus of its mother. **B)** L1. **C)** L2. **D)** L3. **E)** L4. **F)** Adult animal. Scale bars = 10 μm (A,B), 50 μm (C,D,E), and 100 μm (F).

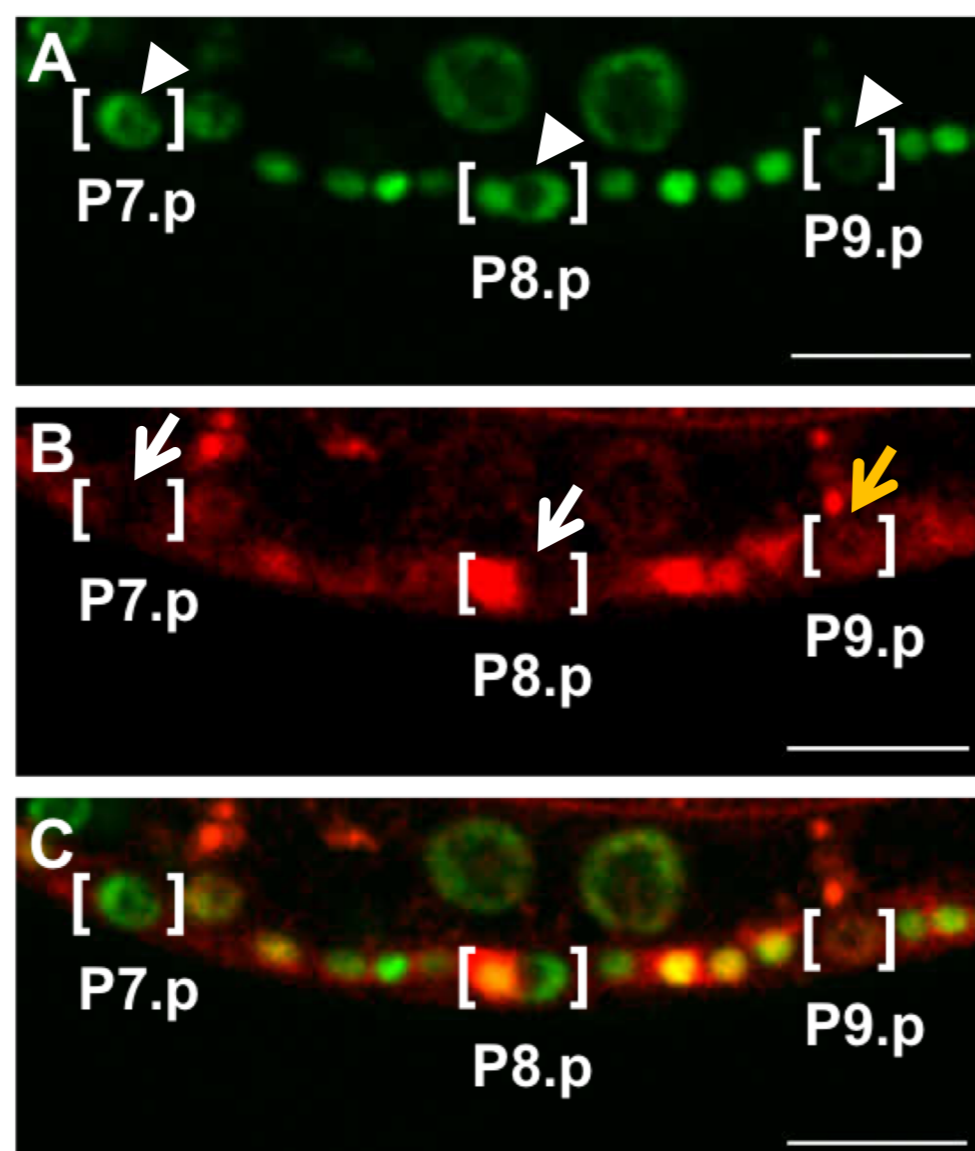

**Fig. S3.** Tagged MPK-1::mKate2 translocates to the nucleus of posterior non-VPC P9.p prior to induction of VPCs P7.p and P8.p. **A)** Green channel nuclei, mNeonGreen::HIS-72. **B)** Red channel MPK-1::mKate2. A ventral cord neuron (bright red puncta) overlaps with the P8.p nuclei **C)** Merged images. Brackets are included around nuclei for references. Many but not all such nuclei have nuclear MPK-1 (smaller ventral nuclei in the figure). Orange arrows indicate nuclei with nuclear MPK-1, white arrows nuclei without nuclear MPK-1. The white arrowhead indicates VPC and non-VPC nuclei with differing levels of mNeonGreen::HIS-72 intensity. Scale bars = 10  $\mu$ m.

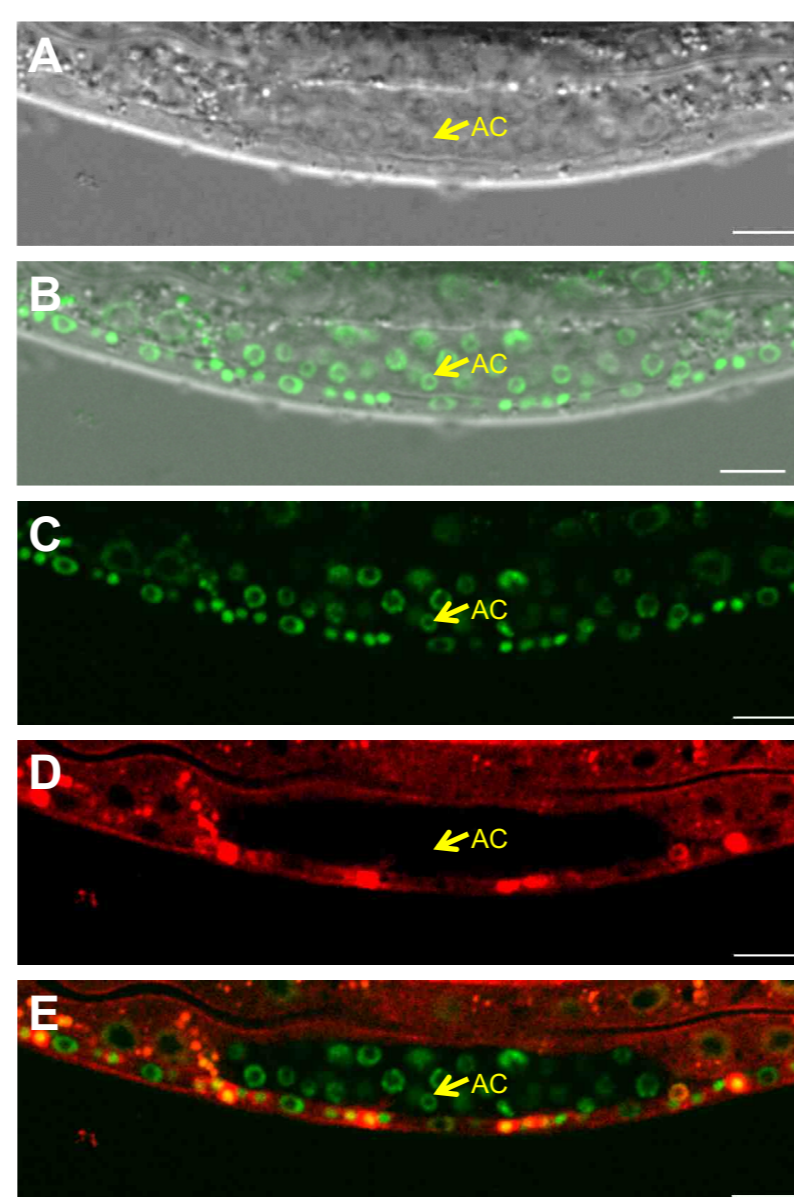

**Fig. S4.** The gradient of relocalization of MPK-1::mKate2 to the nucleus centers on P6.p, the VPC closest the the Anchor Cell in the developing ventral somatic gonad. All spinning disk confocal photomicrographs are of the same animal. **A)** Location of the AC by DIC and **B,C)** merge and mNeonGreen::HIS-72, respectively. **D)** MPK-1::mKate2 and **E)** merge. Yellow arrows point to the AC. Scale bars = 10  $\mu$ m.

**Table S1.**

| Genotype:             | WT  | <i>mpk-1(re172)</i> |
|-----------------------|-----|---------------------|
| L1/L2 Healthy Animals | 380 | 365                 |
| Unhatched             | 0   | 0                   |
| L1/L2 rods            | 0   | 0                   |

**Table S2.**

| Genotype:            | WT | <i>mpk-1(re172)</i> |
|----------------------|----|---------------------|
| Normal Vulvae        | 59 | 52                  |
| Vulvaless            | 0  | 0                   |
| Ectopic Pseudovulvae | 0  | 0                   |

**Table S3. Strains**

| Strain | Genotype                                                                                                                           |
|--------|------------------------------------------------------------------------------------------------------------------------------------|
| DV3261 | <i>mpk-1(re171[mpk-1::mKate2<sup>SEC</sup>3xFlag])</i> III                                                                         |
| DV3262 | <i>mpk-1(re172[mpk-1::mKate2<sup>3xFlag</sup>])</i> III                                                                            |
| DV3285 | <i>his-72(cp76[mNeonGreen<sup>3xFlag</sup>::his-72]), mpk-1(re172[mpk-1::mKate2<sup>3xFlag</sup>])</i> III                         |
| BS3760 | <i>rskn-1(ok159)</i> I                                                                                                             |
| DV3317 | <i>rskn-1(ok159)</i> I; <i>his-72(cp76[mNeonGreen<sup>3xFlag</sup>::his-72]), mpk-1(re172[mpk-1::mKate2<sup>3xFlag</sup>])</i> III |

**Table S4. Primers**

| Name   | Sequence                                                                                                                                                                                                                                                                                                                                | Used for                              |
|--------|-----------------------------------------------------------------------------------------------------------------------------------------------------------------------------------------------------------------------------------------------------------------------------------------------------------------------------------------|---------------------------------------|
| oNR065 | GGCTCATCACAGACGAATGGGTTTAAGAGCT<br>ATGCTGGAAACAG                                                                                                                                                                                                                                                                                        | <i>mpk-1</i> sgRNA-1<br>mutagenesis   |
| oNR066 | AGCTTTTCAGCGGGAACGGGGTTTAAGAGCT<br>ATGCTGGAAACAG                                                                                                                                                                                                                                                                                        | <i>mpk-1</i> sgRNA-2<br>mutagenesis   |
| oNR023 | CAAGACATCTCGCAATAGG                                                                                                                                                                                                                                                                                                                     | <i>mpk-1</i> sgRNA<br>mutagenesis     |
| oNR059 | CGTGATTACAAGGATGACGATGACAAGAGA<br>ATTAGTAGTATTTACCCACTAAATTAG                                                                                                                                                                                                                                                                           | <i>mpk-1</i> homology<br>arm-2 FW     |
| oNR060 | GGAAACAGCTATGACCATGTTATCGATTTC<br>GCTATGATTGTTGTGTAACCC                                                                                                                                                                                                                                                                                 | <i>mpk-1</i> homology<br>arm-2 RV     |
| oNR067 | CGATTTTCAGTATCGACATCGAGCAAGCATT<br>GGCTCACCCATACTTGGAGCAATACTACGAT<br>CCAGGAGATGAGCCAGTTTGTGAGGAACCAT<br>TCACTTTGAAAATGGAATTCGACGATTTACC<br>GAAGGAGAAGCTGAAGGAGCTGATTTGGGA<br>AGAAGCCGAGGCTCATCACAGACGAATGGA<br>GGCAGAAGCGGCTGCAAGGAATAATGGAGG<br>GCAGAATCCTGTTTCAGCCGGAGGTAGCGCC<br>GGCGGAAGTGCTGGTGAATGGTCTCCGAGC<br>TCATTAAGAAAACATG | <i>mpk-1</i> homology<br>arm-1 gBlock |
| oNR094 | ACCAAAACAACCATGGGCTCG                                                                                                                                                                                                                                                                                                                   | <i>mpk-1</i> genotyping<br>FW         |
| oNR095 | GCTCCAAGTATGGGTGAGCC                                                                                                                                                                                                                                                                                                                    | <i>mpk-1</i> genotyping<br>RV-1       |
| oNR096 | GGTCCCTCGTATGGCTTTCC                                                                                                                                                                                                                                                                                                                    | <i>mpk-1</i> genotyping<br>RV-2       |

**Table S5. Plasmids**

| Name    | Description                        | Used for                           |
|---------|------------------------------------|------------------------------------|
| pNR9    | Cas9 and MPK-1 sgRNA-1             | MPK-1 sgRNA-1                      |
| pNR10   | Cas9 and MPK-1 sgRNA-2             | MPK-1 sgRNA-2                      |
| pNR11   | MPK-1::mKate2 <sup>3xFlag</sup>    | SEC CRISPR plasmid repair template |
| pCFJ104 | <i>P<sub>myo-3</sub>::mCherry</i>  | Co-injection marker                |
| pJW1236 | Cas9 and sgRNA expression plasmid  | mpk-1 SEC-CRISPR tagging           |
| pDD285  | mKate2::3xFlag SEC repair template | mpk-1 SEC CRISPR repair template   |

**Table S6. sgRNA sequences and PAMs**

| Sequence             | Used for                 |
|----------------------|--------------------------|
| GGCTCATCACAGACGAATGG | mpk-1 SEC-CRISPR tagging |
| AGCTTTTCAGCGGGAACGGG | mpk-1 SEC-CRISPR tagging |

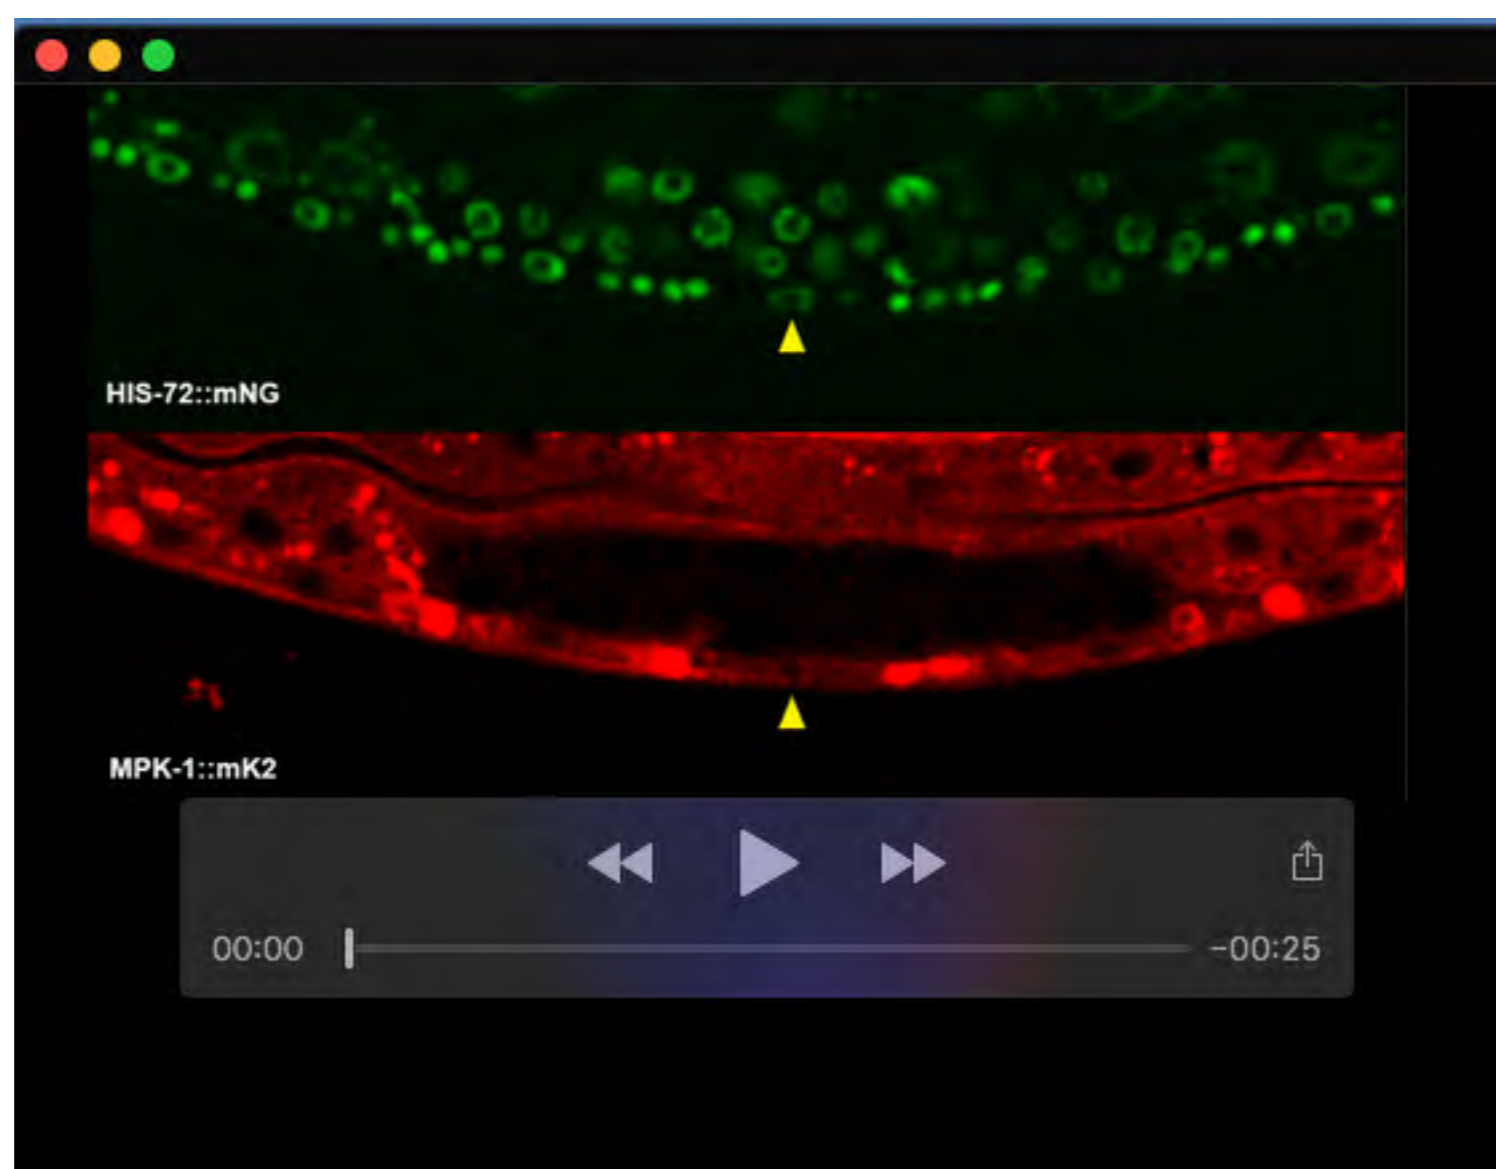

**Movie 1.** Time lapse film of MPK-1::mKate2 entering P6.p first. Arrows indicate P6.p and other VPCs.
